# Supplementary material
Source: ML conference proceedings conference paper supplement (https://proceedings.neurips.cc/paper_files/paper/2011/hash/beed13602b9b0e6ecb5b568ff5058f07-Abstract.html)
Supplement: Supplementary file 1 [file beed13602b9b0e6ecb5b568ff5058f07-Supplemental.zip]

# Simultaneous Sampling and Multi-Structure Fitting with Adaptive Reversible Jump MCMC

Trung Thanh Pham, Tat-Jun Chin, Jin Yu and David Suter  
School of Computer Science, The University of Adelaide, South Australia  
{trung,tjchin,jin.yu,dsuter}@cs.adelaide.edu.au

## Multiple planar homography detection

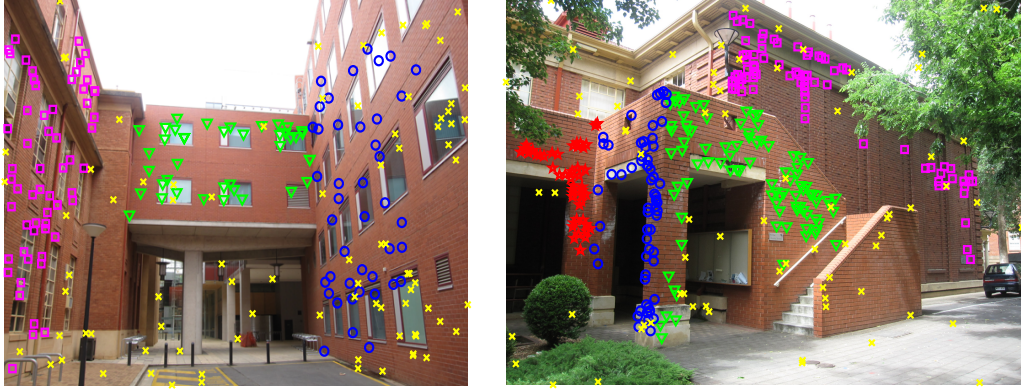

(a) *neem* dataset with 3 planar surfaces (42, 28 and 63 inliers, 122 outliers) (b) *johnsona* dataset with 4 planar surfaces (77, 91, 69, and 58 inliers, 78 outliers)

Figure 1: Examples of 3- and 4-structure datasets (yellow crosses show outliers).

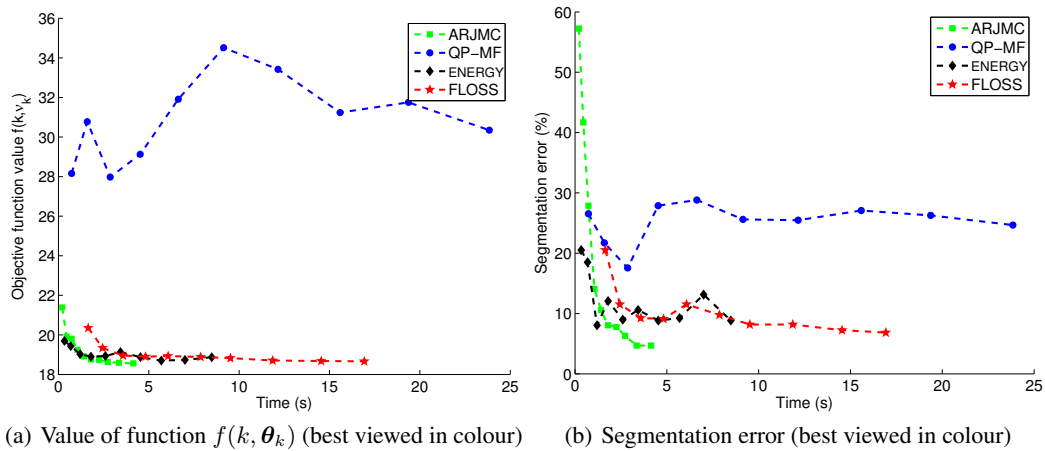

Figure 2: Performance measures of four methods on the dataset in Fig.1 (a).

We also apply our method to multiple planar homography detection [2]. This problem requires two static images of the same scene. The key points of a plane in the first and second image are related by a homography. Our task is to estimate the number of planar surfaces  $k$  and the homography matrices  $\mathbf{H} \in \mathbb{R}^{3 \times 3}$  [1]. The experimental setting is similar to that of two view motion segmentation. We use the publicly available datasets [3] for testing. Fig. 1 shows two example of datasets containing 3 and 4 planar surfaces, respectively. Minimal subsets of size  $p = 4$  correspondences in the two images are used to estimate the homography matrix hypotheses using Direct Linear Transformation [1]. The geometric error is computed as the Sampson distance [1]. Again Multi-GS is applied for hypothesis generation. Fig. 2 shows the performance of four methods on the dataset *johnsona*. Similar to the previous experimental results, ARJMC takes less time to converge to a low value of objective function  $f(k, \theta_k)$  and segmentation error than other methods. Table 1 summaries the comparison results on more datasets, namely *johnsonb*, *elderhallb*, *neem*, *napierb*.

| Dataset<br># inliers<br># outliers | <i>johnsona</i> (4 structures)<br>77, 91, 69, and 58<br>78 |        |       |             | <i>johnsonb</i> (7 structures)<br>20, 77, 291, 69, 41, 15 and 58<br>78 |        |       |              | <i>neem</i> (3 structures)<br>64, 43 and 46<br>88 |        |       |             |
|------------------------------------|------------------------------------------------------------|--------|-------|-------------|------------------------------------------------------------------------|--------|-------|--------------|---------------------------------------------------|--------|-------|-------------|
| M                                  | FLOSS                                                      | ENERGY | QP-MF | ARJMC       | FLOSS                                                                  | ENERGY | QP-MF | ARJMC        | FLOSS                                             | ENERGY | QP-MF | ARJMC       |
| 100                                | 20.51                                                      | 20.51  | 26.54 | 57.24       | 26.35                                                                  | 45.30  | 47.61 | 61.02        | 27.39                                             | 32.78  | 37.76 | 51.04       |
| 200                                | 11.53                                                      | 18.50  | 22.39 | 41.69       | 20.80                                                                  | 23.73  | 30.97 | 47.77        | 21.16                                             | 31.95  | 41.91 | 53.11       |
| 300                                | 9.25                                                       | 8.04   | 18.50 | 27.88       | 22.03                                                                  | 29.89  | 39.60 | 39.60        | 23.24                                             | 30.29  | 41.08 | 17.01       |
| 400                                | 9.12                                                       | 12.06  | 28.02 | 14.08       | 20.49                                                                  | 23.57  | 35.13 | 34.05        | 22.41                                             | 34.02  | 38.59 | 8.30        |
| 500                                | 11.53                                                      | 8.98   | 28.82 | 10.59       | 15.25                                                                  | 26.50  | 39.45 | 29.28        | 10.79                                             | 30.71  | 38.59 | 8.30        |
| 600                                | 9.79                                                       | 10.59  | 25.60 | 8.04        | 17.41                                                                  | 24.50  | 34.67 | 29.74        | 14.11                                             | 21.99  | 36.51 | 7.47        |
| 700                                | 8.18                                                       | 8.85   | 25.60 | 7.77        | 17.41                                                                  | 23.11  | 36.52 | 26.66        | 11.62                                             | 27.80  | 38.17 | <b>7.05</b> |
| 800                                | 8.18                                                       | 9.25   | 27.08 | 6.30        | 18.03                                                                  | 24.19  | 33.59 | 17.10        | 9.54                                              | 26.56  | 36.51 | 7.05        |
| 900                                | 7.24                                                       | 13.14  | 26.27 | <b>4.69</b> | 18.03                                                                  | 17.26  | 24.65 | 15.41        | 11.20                                             | 25.73  | 38.17 | 7.05        |
| 1000                               | 6.84                                                       | 8.85   | 24.66 | 4.69        | 17.72                                                                  | 22.50  | 32.51 | <b>14.02</b> | 9.54                                              | 23.24  | 38.17 | 7.05        |
| Time (seconds)                     | 16.93                                                      | 8.48   | 23.84 | <b>4.15</b> | 34.27                                                                  | 14.52  | 38.07 | <b>6.20</b>  | 11.41                                             | 5.91   | 16.55 | <b>2.93</b> |
| Dataset<br># inliers<br># outliers | <i>elderhallb</i> (3 structures)<br>42, 28 and 63<br>122   |        |       |             | <i>napierb</i> (3 structures)<br>49, 36, and 72<br>102                 |        |       |              |                                                   |        |       |             |
| M                                  | FLOSS                                                      | ENERGY | QP-MF | ARJMC       | FLOSS                                                                  | ENERGY | QP-MF | ARJMC        |                                                   |        |       |             |
| 100                                | 23.53                                                      | 29.41  | 46.27 | 29.80       | 25.48                                                                  | 23.17  | 34.36 | 27.41        |                                                   |        |       |             |
| 200                                | 11.76                                                      | 27.06  | 37.65 | 21.57       | 24.71                                                                  | 21.24  | 32.43 | 19.31        |                                                   |        |       |             |
| 300                                | 11.37                                                      | 27.06  | 36.86 | 15.69       | 24.71                                                                  | 25.10  | 31.27 | 13.90        |                                                   |        |       |             |
| 400                                | 10.20                                                      | 29.02  | 30.20 | 15.69       | 23.17                                                                  | 22.01  | 28.57 | 13.51        |                                                   |        |       |             |
| 500                                | 10.20                                                      | 29.80  | 36.47 | 15.69       | 24.32                                                                  | 26.64  | 28.96 | 13.51        |                                                   |        |       |             |
| 600                                | 9.80                                                       | 30.59  | 38.43 | 11.76       | 24.32                                                                  | 26.64  | 28.96 | <b>12.36</b> |                                                   |        |       |             |
| 700                                | 9.80                                                       | 30.20  | 34.12 | 11.76       | 26.25                                                                  | 26.25  | 30.50 | 12.36        |                                                   |        |       |             |
| 800                                | 10.20                                                      | 23.92  | 34.51 | <b>5.49</b> | 26.64                                                                  | 25.10  | 27.80 | 12.36        |                                                   |        |       |             |
| 900                                | 13.33                                                      | 30.98  | 33.73 | 5.49        | 26.64                                                                  | 26.25  | 30.12 | 12.36        |                                                   |        |       |             |
| 1000                               | 9.41                                                       | 26.67  | 34.12 | 5.49        | 26.64                                                                  | 25.87  | 31.66 | 12.36        |                                                   |        |       |             |
| Time (seconds)                     | 11.64                                                      | 6.20   | 17.65 | <b>3.24</b> | 12.56                                                                  | 6.25   | 16.79 | <b>3.29</b>  |                                                   |        |       |             |

Table 1: Median segmentation error (%) at different number of hypotheses  $M$ . Time elapsed at  $M = 1000$  is shown at the bottom. The lowest error and time achieved on each dataset is boldfaced.

## References

- [1] R. Hartley and A. Zisserman. *Multiple View Geometry*. Cambridge University Press, 2004.
- [2] E. Vincent and R. Laganière. Detecting planar homographies in an image pair. In *International Symposium on Image and Signal Processing and Analysis*, 2001.
- [3] H. S. Wong, T.-J. Chin, J. Yu, and D. Suter. Dynamic and hierarchical multi-structure geometric model fitting. In *International Conference on Computer Vision (ICCV)*, 2011.
